# Supplementary material for: Ceftolozane/Tazobactam Plus Metronidazole for Complicated Intra-abdominal Infections in an Era of Multidrug Resistance: Results From a Randomized, Double-Blind, Phase 3 Trial (ASPECT-cIAI)
Source: PubMed Central journal article supplement — Clin Infect Dis. 2015 Feb 10;60(10):1462–71. doi: 10.1093/cid/civ097 (PMC4412191; doi:10.1093/cid/civ097), 2015-02-10
Supplement: supp_civ097_civ097supp_fig1.pdf [file supp_civ097_civ097supp_fig1.pdf]

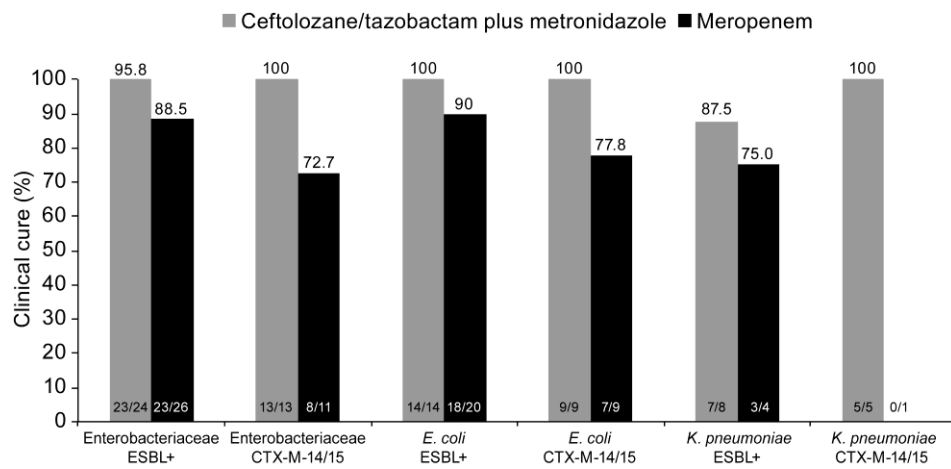

**Supplementary Figure.** Per-pathogen clinical cure of baseline ESBL-producing Enterobacteriaceae at test-of-cure in evaluable patients with a (susceptible or resistant) pathogen at baseline. Most of the CTX-M-14/15 ESBL-producing isolates produced multiple enzymes and also expressed 1 or more of the following: OXA-1/30, TEM-1, SHV-1, SHV-11, SHV-32. Abbreviation: ESBL, extended-spectrum  $\beta$ -lactamase.
