# Supplementary material for: Ceftolozane/Tazobactam Plus Metronidazole for Complicated Intra-abdominal Infections in an Era of Multidrug Resistance: Results From a Randomized, Double-Blind, Phase 3 Trial (ASPECT-cIAI)
Source: PubMed Central journal article supplement — Clin Infect Dis. 2015 Feb 10;60(10):1462–71. doi: 10.1093/cid/civ097 (PMC4412191; doi:10.1093/cid/civ097), 2015-02-10
Supplement: supp_civ097_civ097supp_tables.pdf [file supp_civ097_civ097supp_tables.pdf]

### Supplementary Table 1. Analysis Populations

|                                 |      |                                                                                                                                                                                                                           |
|---------------------------------|------|---------------------------------------------------------------------------------------------------------------------------------------------------------------------------------------------------------------------------|
| Intent-to-treat                 | ITT  | All randomized patients regardless of receipt of study drug                                                                                                                                                               |
| Microbiological intent-to-treat | MITT | All randomized patients with at least 1 baseline pathogen identified in abscess or peritonitis fluid, regardless of susceptibility to study drug                                                                          |
| Clinically evaluable            | CE   | All randomized patients who received protocol-specified amount of study drug, met the protocol-specific disease definition of cIAI, adhered to trial procedures, and had a test-of-cure visit within the specified window |
| Microbiologically evaluable     | ME   | The subset of CE patients who had at least 1 baseline infecting pathogen identified that was susceptible to study drug                                                                                                    |

Abbreviation: cIAI, complicated intra-abdominal infection.

**Supplementary Table 2. Per-pathogen Clinical Cure of Baseline Intra-abdominal Pathogens at the Test-of-Cure Visit (ME Population<sup>a</sup>)**

| <b>Pathogen, n/N (%)</b>                 | <b>Ceftolozane/tazobactam<br/>plus metronidazole<br/>(n = 307)</b> | <b>Meropenem<br/>(n = 345)</b> |
|------------------------------------------|--------------------------------------------------------------------|--------------------------------|
| <b>Gram-negative aerobes</b>             | 238/252 (94.4)                                                     | 273/291 (93.8)                 |
| Enterobacteriaceae                       | 227/241 (94.2)                                                     | 255/272 (93.8)                 |
| <i>Enterobacter cloacae</i>              | 19/22 (86.4)                                                       | 22/22 (100)                    |
| <i>Escherichia coli</i>                  | 197/208 (94.7)                                                     | 216/231 (93.5)                 |
| <i>Klebsiella oxytoca</i>                | 12/12 (100)                                                        | 21/22 (95.5)                   |
| <i>Klebsiella pneumoniae</i>             | 28/30 (93.3)                                                       | 22/25 (88.0)                   |
| <i>Proteus mirabilis</i>                 | 10/11 (90.9)                                                       | 9/10 (90.0)                    |
| <i>Pseudomonas aeruginosa</i>            | 26/26 (100)                                                        | 27/29 (93.1)                   |
| <b>Gram-negative anaerobes</b>           | 104/109 (95.4)                                                     | 132/137 (96.4)                 |
| <i>Bacteroides fragilis</i>              | 39/41 (95.1)                                                       | 56/57 (98.2)                   |
| <i>Bacteroides ovatus</i>                | 36/37 (97.3)                                                       | 42/42 (100)                    |
| <i>Bacteroides thetaiotaomicron</i>      | 20/20 (100)                                                        | 40/43 (93.0)                   |
| <i>Bacteroides vulgatus</i>              | 12/13 (92.3)                                                       | 21/22 (95.5)                   |
| <b>Gram-positive aerobes<sup>c</sup></b> | 153/168 (91.1)                                                     | 170/185 (91.9)                 |
| <i>Enterococcus faecalis</i>             | 31/37 (83.8)                                                       | 37/40 (92.5)                   |
| <i>Enterococcus faecium</i>              | 23/25 (92.0)                                                       | 38/41 (92.7)                   |
| <i>Staphylococcus aureus</i>             | 13/13 (100)                                                        | 12/12 (100)                    |
| <i>Streptococcus anginosus</i>           | 25/30 (83.3)                                                       | 23/23 (100)                    |
| <i>Streptococcus constellatus</i>        | 17/18 (94.4)                                                       | 20/23 (87.0)                   |
| <i>Streptococcus salivarius</i>          | 9/10 (90.0)                                                        | 8/8 (100)                      |

Data are presented for pathogens isolated in 10 or more patients in the ceftolozane/tazobactam plus metronidazole treatment group. Other gram-negative anaerobes isolated in less than 10 patients included: other *Bacteroides* spp., *Fusobacterium* spp., *Parabacteroides distasonis*, and *Prevotella* spp. Gram-positive anaerobes included *Bifidobacterium* spp., *Clostridium perfringens*, non-perfringens *Clostridium* spp., *Collinsella aerofaciens*, *Eggerthella lenta*, *Eubacterium* spp., *Propionibacterium acnes*, *Slackia exigua*, *Parvimonas micra*, *Peptoniphilus asaccharolyticus*, and *Peptostreptococcus anaerobius*.

Abbreviations: ME, microbiologically evaluable; MEM, meropenem; TOL/TAZ + MTZ, ceftolozane/tazobactam plus metronidazole.

<sup>a</sup> Includes patients with pathogens at baseline that were susceptible or resistant to study drug.

## Supplementary Information

The following lead investigators participated in the trial.

A. Antadze, Ltd “Saint Michael Archange/Multifunctional Clinical Hospital,” Tbilisi, Georgia; A. Geguzis, Siauliai Republican Hospital, Siauliai, Lithuania; A. Khamitov, State Healthcare Institution “G.G. Kuvatov Republican Clinical Hospital,” Ufa, Russia; A. Miron, Spitalul Universitar de Urgenta Elias, Bucuresti, Romania; A. Mykietiuk, Instituto Médico Platense Avenida, Buenos Aires, Argentina; A. Oláh, Petz Aladár Megyei Oktató Kórház, Győr, Hungary; A. Ottlakán, Békés Megyei Pándy Kálmán Kórház, Bekes, Hungary; A. Severtsev, Non-State Institution of Healthcare “Central Clinical Hospital,” Moscow, Russia; A. Shulutko, State Institution of Healthcare of Moscow City, “City Clinical Hospital #61,” Moscow, Russia; A. Slepavicius, Klaipeda University Hospital, Klaipeda, Lithuania; A. Sternlicht, Steward Saint Elizabeth’s Medical Center, Boston, Massachusetts, USA; A. Szczepanik, Szpital Uniwersytecki w Krakowie, Malopolskie, Poland; A. Szijártó, Semmelweis Egyetem, Budapest, Hungary; A. Tamariz Becerra, Hospital CIMA, Chihuahua, Mexico; A. Tein, Tartu University Hospital, Tartu, Estonia; A. Timerman, Complexo Hospitalar Edmundo Vasconcelos, Sao Paulo, Brazil; A. Trudnikov, East Tallinn Central Hospital, Tallinn, Estonia; A. Zaychuk, Municipal Institution “Odessa Regional Clinical Hospital,” Odessa, Ukraine; A.I. Ruxanda, Spitalul Judetean de Urgenta, Craiova, Romania; A.R. Minguez, Hospital Nuestra Señora de la Misericordia, Cordoba, Argentina; A.T. Freire, Santa Casa de Misericórdia de Belo Horizonte, Gerais, Brazil; B. Bakity, Magyar Honvédség-Egészségügyi Központ, Budapest, Hungary; B. Hiremath, M.S. Ramaiah Medical College and Hospital, Karnataka, India; B. Kotiv, State Educational Institution “S.M. Kirov Military Medical Academy of Ministry of Defense of Russia,” St. Petersburg, Russia; B. Kovacevic, Clinical Hospital Centre Zvezdara, Belgrade, Serbia; B. Modzelewski, SPZOZ Uniwersytecki Szpital, Lodz, Poland; B. Mosidze, High Technology Medical Center, Tbilisi, Georgia; B. Patskan, Uzhgorod City Clinical Hospital, Uzhgorod, Ukraine; B. Richards, Gold Coast Hospital, Southport, Queensland, Australia; B. Škurla, Clinical Hospital Merkur, Zagreb, Croatia; B.R.C. Reddy, Apollo Hospitals, Andhra Pradesh, India; C. Bergallo, Hospital Córdoba, Córdoba, Argentina; C. Galvez Vasquez, Hospital Maria Auxiliadora, Lima, Peru; C. Iancu, Institutul Regional de Gastroenterologie-Hepatologie, Cluj-Napoca, Romania; C. Lucasti, South Jersey Infectious Disease, Somers Point, New Jersey, USA; C. Remolif, Hospital Zonal General de Agudos “Héroes de Malvinas,” Buenos Aires, Argentina; C. Schrock, Infectious Diseases Minneapolis, Ltd., Minneapolis, Minnesota, USA; C. van Dyk, Boland Ethical Research Group, Worcester, Western Cape, South Africa; C.E. Pérez Diaz, Clinica de Marly S.A., Bogota, Colombia; C.M. Neves, Hospital Mãe de Deus, Centro de Pesquisa Clínica em Pneumologia e Infectologia, Rio Grande, Brazil; C.M. Tecau, Spitalul Clinic Judetean de Urgenta Brasov, Brasov, Romania; D. Canovic, Clínica Center Kragujevac, Kragujevac, Serbia; D. Ernest, Monash Medical Centre, Clayton, Victoria, Australia; D. Graham, Springfield Clinic Infectious Diseases, Springfield, Illinois, USA; D. Le Roux, Sunninghill Hospital, Johannesburg, South Africa; D. Rodriguez Gonzalez, Hospital Civil de Guadalajara, Guadalajara, Jalisco, Mexico; D. Stojanovic, Clinical Hospital Center Zemun, Belgrade, Serbia; D. Teodorescu, Spitalul Clinic Judetean de Urgenta Brasov, Brasov, Romania; E. Freitas Alvarado, Clinica Ricardo Palma, Lima, Peru; E. Montaño-Gonzalez, Hospital San Pío, Guadalajara, Jalisco, Mexico; E. Pasechnik, Kaluga Regional Hospital, Kaluga, Russia; E. Ponomarev, City Clinical Emergency Hospital, Volgograd, Russia; E. Rodriguez Noriega, Antiguo Hospital Civil de Guadalajara Fray Antonio Alcalde, Guadalajara, Jalisco, Mexico; E. Silva, Hospital Universitário São José, Minas Gerais, Brazil; E. Vasile Gutu, Municipal Clinical Hospital No 1, Chisinau, Moldova; E. Zarembo, Rezeknes Hospital, Rezekne, Latvia; E.D. Matos Prado, Hospital Nacional Arzobispo Loayza, Lima, Peru; F. Ender, Jahn Ferenc Dél-Pesti Kórház és Rendelintézet, Budapest, Hungary; F. Jacobs, ULB Erasme, Brussels, Belgium; F. Popa, Spitalul Clinic de Nefrologie, Bucuresti, Romania; F. Remzi, Cleveland Clinic, Cleveland, Ohio, USA; F.O. Lazar, Spitalul Clinic

Judetean de Urgenta Timisoara Surgery III, Timisoara, Romania; G. Ambasch, Hospital San Roque, Cordoba, Argentina; G. Barauskas, Hospital of Lithuania University of Health Sciences Kaunas Clinics, Kaunas, Lithuania; G. Cesnauskas, Kaunas Republican Hospital, Kaunas, Lithuania; G. DaSilva, Cleveland Clinic Florida, Weston, Florida, USA; G. Grigorov, University Multiprofile Hospital for Active Treatment and Emergency Medicine, Sofia, Bulgaria; G. Lázár, Szegedi Tudományegyetem, Csongrad, Hungary; G. Lopardo, Hospital Municipal "Prof. Dr. Bernardo Houssay," Buenos Aires, Argentina; G. Molnár, Csongrád Megyei Dr. Bugyi István Kórház, Csongrad, Hungary; G. Morera, Hospital Dr. José María Cullen, Santa Fe, Argentina; G. Pupelis, LLC "Riga East University Hospital," Riga, Latvia; G. Rahav, The Chaim Sheba Medical Center, Tel Hashomer, Israel; G. Rodoman, City Clinical Hospital #13, Moscow, Russia; G. Sánchez Vallejo, Cequin-Funcadion Cardiomet, Armenia, Colombia; G. Sander, Hospital Ernesto Dornelles, Serviço de Gastroenterologia, Gerais, Brazil; G. Wallner, Samodzielny Publiczny Szpital, Lublin, Poland; H. Vasquez Cubas, Hospital de Emergencias Grau, Lima, Peru; I. Duda, University Hospital Trnava Surgical Clinic, Trnava, Slovak Republic; I. Georgescu, Spitalul Judetean de Urgenta Craiova, Craiova, Romania; I. Gyssens, Jessa Ziekenhuis-Campus, Limburg, Belgium; I. Khodareva, State Healthcare Institution "Kemerovo Regional Clinical Hospital," Kemerovo, Russia; I. Martin-Loeches, Corporació Sanitaria Parc Taulí, Barcelona, Spain; I. Motylev, Municipal Medical and Prophylactic Institution, Novgorod, Russia; I. Oren, Rambam Health Corp., Haifa, Israel; I. Polianskyi, Bucovinian State Medical University, Chernivtsi, Ukraine; I. Popescu, Institutul Clinic Fundeni, Bucuresti, Romania; J. Aguado, Hospital Universitario 12 de Octubre, Madrid, Spain; J. Araujo Melendez, Hospital Central "Dr. Ignacio Morones Prieto," San Luis Potosi, Mexico; J. Cima, Hospital Ramón Carrillo, Buenos Aires, Argentina; J. Cincikas, Vilnius City Clinical Hospital, Vilnius, Lithuania; J. Claridge, MetroHealth Medical Center, Cleveland, Ohio, USA; J. Flores Yabar, Centro Médico Naval "Cirujano Mayor Santiago Tavera," Callao, Peru; J. Fraiz, Infectious Disease of Indiana, PSC, Carmel, Indiana, USA; J. Furtado, Hospital Heliópolis, Sao Paulo, Brazil; J. Gardovskis, Pauls Stradins Clinical University Hospital, Riga, Latvia; J. Gentile, Hospital Municipal Ramon Santa Marina, Tandil, Argentina; J. Jayaraj, PVS Hospital (P) Ltd., Kerala, India; J. Kladny, Samodzielny Publiczny Szpital, Zachodniopomorskie, Poland; J. Lind, East Viru Central Hospital, Ahtme, Estonia; J. McBride, Cairns Base Hospital, Cairns, Queensland, Australia; J. Muransky, St. Lucas Hospital and Outpatient Healthcare Facility, Galanta, Slovak Republic; J. Perez, Hospital Padre Hurtado, Santiago, Chile; J. Tellado, Hospital Gral Gregorio Marañon, Madrid, Spain; J. Teras, North Estonia Medical Centre Foundation, Tallinn, Estonia; K. Chellappan, NIMS Medicity, Kerala, India; K. Kolomecki, Wojewódzki Szpital Specjalistyczny im. Mikolaja Kopernika w Lodzi Klinika Chirurgii Endokrynologicznej, Łódź, Poland; K. Mirkia, eStudySite, San Diego, California, USA; K. Stockamp, Pensacola Research Consultants, Inc., Pensacola, Florida, USA; K. Strupas, Vilnius University Hospital, Vilnius, Lithuania; K. Vasilev, Military Medical Academy–Sofia Clinic of Endoscopic, Endocrine Surgery and Coloproctology, Sofia, Bulgaria; L. Hercilla Vasquez, Hospital Alberto Sabogal Sologuren, Callao, Peru; L. Lenskaya, Regional State Healthcare Institution "Tomsk Regional Clinical Hospital," Tomsk, Russia; L. Sinkovic, University Hospital with Policlinic F.D. Roosevelt, Banska Bystrica, Slovak Republic; L. Stefanova, Multiprofile Hospital for Active Treatment Ruse, Ruse, Bulgaria; M. Beuran, Spitalul Clinic de Urgenta Bucuresti, Bucuresti, Romania; M. Bourgeois, Algemeen Ziekenhuis Sint-Jan, West-Vlaanderen, Belgium; M. Cainzos, Hospital Clínico Universitario de Santiago de Compostela, Coruna, Spain; M. Chowers, Meir Medical Center, Sharon, Israel; M. Del Castillo Yrigoyen, Hospital Nacional Cayetano Heredia, Lima, Peru; M. Donovan, Nambour General Hospital, Nambour, Queensland, Australia; M. Ganaha, Hospital Interzonal General de Agudos "Vicente López y Planes," Buenos Aires, Argentina; M. Lima, Hospital e Maternidade Celso Pierrô/ Sociedade Campineira de Educação e Instrução Pesquisa Clinica MI, Sao Paulo, Brazil; M. Makhviladze, Vakhtang Bochorisvili Antiseptic Center, Ltd., Tbilisi, Georgia; M. Maldonado, Sanatorio Mayo Privado SA, Cordoba, Argentina; M. Nalivaiko, Liepajas Regional

Hospital, Liepaja, Latvia; M. Oyanguren, Hospital Nacional Edgardo Rebagliati Martins, Lima, Peru; M. Svébis, Bács Kiskun Megyei Kórháza, Kecskemét, Hungary; M. Whitmill, Miami Valley Hospital, Dayton, Ohio, USA; M. Wood, Southwest Surgical Associates, LLP, Houston, Texas, USA; M. Zanoaga, Municipal Clinical Hospital “Sf. Arhanghel Mihai,” Chisinau, Moldova; M.A. Mastruzzo, Hospital Zonal General de Agudos “Dr. C.A. Bocalandro,” Buenos Aires, Argentina; M.A. Muñoz Reyes, Hospital Hernán Henríquez, Temuco, Chile; M.E. Oliva, Hospital San Martín, Entre Ríos, Argentina; M.J. Kim, Korea University Anam Hospital, Seoul, South Korea; M.J. Mayorga Espichan, Hospital Central Fuerza Aérea del Perú, Lima, Peru; M.V. Todoran, Spitalul Clinic Judetean Cluj-Napoca, Cluj-Napoca, Romania; M.W. Büchler, Universitätsklinikum Heidelberg, Baden-Württemberg, Germany; N. Djordjevic, Clinical Central Nis, Nis, Serbia; N. Lomidze, Academician N. Kipshidze Central University Clinic Ltd, Tbilisi, Georgia; N. Penkov, UMHAT “Tsaritsa Yoanna–ISUL,” Sofia, Bulgaria; O. Datsenko, Municipal Institution of Health Protection “City Clinical Hospital 2,” Kharkiv, Ukraine; O. Dudnyk, Cherkasy Regional Hospital, Cherkasy, Ukraine; O. Pyptiuk, Ivano-Frankivsk Central City Clinical Hospital, Ivano-Frankivsk, Ukraine; O. Skobenko, Kyiv City Clinical Hospital of Emergency Medical Service, Kyiv, Ukraine; O. Smatana, University Hospital Trencin Surgical Clinic, Trencin, Slovak Republic; P. Ciesielski, Szpital Powiatowy w Wolominie, Wolomin, Poland; P. Goldberg, Groote Schuur Hospital, Cape Town, South Africa; P. Vattay, Zala Megyei Kórház, Zala, Hungary; R. Bellomo, Austin Hospital, Heidelberg, Victoria, Australia; R. Bhojwani, Santokba Durlabhji Memorial Hospital, Rajasthan, India; R. Contreras Pisfil, Hospital Regional Docente de Trujillo, Trujillo, Peru; R. Ferrer, Hospital Mútua de Terrassa, Barcelona, Spain; R. Stipic, Clinical Hospital Center Split, Split Dalmatia, Croatia; R. Veljkovic, Clinical Centre of Vojvodina, Novi Sad, Serbia; R. Zamora Gomez, Hospital General de Culiacán, Culiacán, Sinaloa, Mexico; S-H. Choi, Chung-Ang University Hospital, Seoul, South Korea; S-H. Wie, The Catholic University of Korea Saint Vincent’s Hospital, Gyeonggi-do, South Korea; S. Dhadphale, Ruby Hall Clinic, Grant Medical Foundation, Maharashtra, India; S. Efrati, Assaf Harofeh Medical Centre, Beer Yahkov, Israel; S. Francque, Universitair Ziekenhuis Antwerpen, Antwerp, Belgium; S. Gutierrez-Castro, Hospital Regional de Alta Especialidad de Veracruz, Veracruz, Mexico; S. Kosulnikov, Dnipropetrovsk State Medical Academy, Regional Clinical Hospital, Dnipropetrovsk, Ukraine; S. Lazzeri, Hospital Escuela “General José F. de San Martín,” Corrientes, Argentina; S. Lobo, Fundação Faculdade Regional de Medicina de Sao Jose do Rio Preto, Sao Paulo, Brazil; S. Prieto, Hospital Zonal Nuestra Señora de Lujan, Buenos Aires, Argentina; S. Stawicki, The Ohio State University, Columbus, Ohio, USA; S. Tiwari, King George Medical University, Uttar Pradesh, India; S. Towfigh, Cedars-Sinai Medical Center, Los Angeles, California, USA; S. Ungureanu, Republican Clinical Hospital, Chisinau, Moldova; S. Unnikrihnan, Chettinad Hospital and Research Institute, Tamil Nadu, India; S. Utzolino, Universitätsklinikum Freiburg Chirurgische Klinik, Baden-Württemberg, Germany; S. Vasyluk, Ivano-Frankivsk Central City Clinical Hospital, Ivano-Frankivsk, Ukraine; T. Birch, Holy Name Medical Center, Teaneck, New Jersey, USA; T. Ikerd, Infectious Disease of Indiana, PSC, Carmel, Indiana, USA; T. Oláh, Kaposi Mór Megyei Oktató Kórház, Kaposvár, Hungary; U. Kupcs, Vidzemes Hospital, Valmiera, Latvia; V. Gostishev, State Healthcare Institution “Municipal Clinical Hospital #23” of Medsantrud of Moscow Healthcare Dept., Moscow, Russia; V. Lovcinovskis, Daugavpils Regional Hospital, Daugavpils, Latvia; V. Milev, Military Medical Academy–Multiprofile Hospital for Active Treatment Varna Clinic of Anesthesiology, Varna, Bulgaria; V. Neshta, State Institution Departmental Clinical Hospital of Zaporizhzhya-2 station of the State Enterprise, Zaporizhzhya, Ukraine; V. Petras, St. Jacob Hospital and Outpatient Healthcare Facility, Bardejov, Slovak Republic; V. Simanenkova, Saint-Petersburg State Institution of Health Protection City Hospital #26, St. Petersburg, Russia; Y. Petkov, University Multiprofile Hospital for Active Treatment “Dr. Georgi Stranski,” Pleven, Bulgaria; Y. Volkova, A.I. Meschaninov City Clinical Hospital of Emergency Care, Kharkiv, Ukraine; Y.K. Cho, Gachon University Gil Hospital, Incheon, South Korea; Y.K. Kim, Yonsei University Wonju College of Medicine Wonju

Christian Hospital, Gangwon-do, South Korea; Y.S. Kim, Asan Medical Center, Seoul, South Korea; Ž. Cabrijan, Clinical Hospital Dubrava, Zagreb, Croatia; Z. Marjanek, Jávorszky Ödön Kórház, Pest, Hungary; Z. Szabó, Uzsoki Utcai Kórház, Budapest, Hungary.
